# Supplementary material for: Harmine induces anticancer activity in breast cancer cells via targeting TAZ
Source: PubMed Central journal article supplement — Int J Oncol. 2019 Apr 9;54(6):1995–2004. doi: 10.3892/ijo.2019.4777 (PMC6521938; doi:10.3892/ijo.2019.4777), 2019-04-09
Supplement: IJO-54-06-1995-Supplementary_Data.pdf [file IJO-54-06-1995-Supplementary_Data.pdf]

**Table SI. Information and clinicopathological data of 45 pairs of tumor and normal tissues from patients with LSCC.**

| Characteristics                     | Number (%) |
|-------------------------------------|------------|
| Sex                                 |            |
| Male                                | 45 (100.0) |
| Female                              | 0 (0.00)   |
| Age (years)                         |            |
| <60 <sup>a</sup>                    | 19 (42.2)  |
| ≥60                                 | 26 (57.8)  |
| Smoking                             |            |
| No                                  | 7 (15.6)   |
| Yes                                 | 38 (84.4)  |
| Alcohol consumption                 |            |
| No                                  | 18 (40.0)  |
| Yes                                 | 27 (60.0)  |
| TNM stage                           |            |
| I + II                              | 18 (40.0)  |
| III+IV                              | 27 (60.0)  |
| Cervical lymph node metastasis      |            |
| No                                  | 24 (53.3)  |
| Yes                                 | 21 (46.7)  |
| Pathological differentiation degree |            |
| Well                                | 24 (53.3)  |
| Moderate/poor                       | 21 (46.7)  |

<sup>a</sup>Median age of the 45 patients. LSCC, laryngeal squamous cell carcinoma.

**Table SII. Oligonucleotide sequences used in this study.**

| Gene                                                 | Sequence                                                          |
|------------------------------------------------------|-------------------------------------------------------------------|
| <i>MIR155HG</i>                                      | F: 5'-CCCAAATCTAGGTTCAAGTTC-3'                                    |
|                                                      | R: 5'-CATCTAAGCCTCACAACAAC-3'                                     |
| <i>GAPDH</i>                                         | F: 5'-AGGTGAAGGTCGGAGTCAACG-3'                                    |
|                                                      | R: 5'-AGGGGTCATTGATGGCAACA-3'                                     |
| <i>miR-155-5p</i> (stem-loop reverse transcription ) | 5'-GTCGTATCCAGTGCAGGGTCCGAGGTATTC<br>GCACTGGATACGACACCCCTAT-3'    |
| <i>miR-155-5p</i>                                    | F: 5'-GTGCAGGGTCCGAGGTATT-3'                                      |
|                                                      | R: 5'-GCCGCTTAATGCTAATCGTGATAG-3'                                 |
| <i>U6</i>                                            | F: 5'-GCTTCGGCAGCACATATACTAAAAT-3'                                |
|                                                      | R: 5'CGCTTCACGAATTTGCGTGTCAT-3'                                   |
| <i>SOX10</i>                                         | F: 5'-CCTCACAGATCGCCTACACC -3'                                    |
|                                                      | R: 5'-CATATAGGAGAAGGCCGAGTAGA-3'                                  |
| <i>miR-155-5p</i> mimic                              | 5'-UUA AUGCUAAUCGUGAUAGGGGU<br>CCCUAUCACGAUUAGCAUUAUU-3'          |
| <i>miR-155-5p</i> inhibitor                          | 5'-ACCCCUAUCACGAUUAGCAUUA-3'                                      |
| <i>miR-155-5p</i> NC                                 | 5'-CAGUACUUUUGUGUAGUACAA-3'                                       |
| <i>MIR155HG</i> -sh1                                 | GCAGATAACTTGTCTGCATTTCAAGAGAATG<br>CAGACAAGTTATCTGCTTTTTT         |
| <i>MIR155HG</i> -sh2                                 | GCATTCACATGGAACAAATTTCAAGAGAATT<br>TGTTCCATGTGAATGCTTTTTT         |
| <i>MIR155HG</i> -sh3                                 | GGTATTCACTGTAACCAATTCAAGAGATTG<br>GTTACAGTGAATAACCTTTTTT          |
| <i>MIR155HG</i> -sh4                                 | GCTTAGATGAGATAGAGAATTCAAGAGATTC<br>TCTATCTCATCTAAGCTTTTTT         |
| <i>MIR155HG</i> -sh-NC                               | GCACCCAGTCCGCCCTGAGCAAATTCAAGAG<br>ATTTGCTCAGGGCGGACTGGGTGCTTTTTT |
| pmirGLO <i>SOX10</i> -wild                           | F:                                                                |

|                                                                                                                                                                                        |                                     |
|----------------------------------------------------------------------------------------------------------------------------------------------------------------------------------------|-------------------------------------|
|                                                                                                                                                                                        | 5'-GATGCTAGCGAATCCTGACCTGTACAT-3'   |
|                                                                                                                                                                                        | R: 5'-GCCTCTAGATAACCGGAACCTTTAAT-3' |
| pmirGLO <i>SOX10</i> -mut                                                                                                                                                              | F: 5'-CTCGCATTCCACATAATAAAATTAAG-3' |
|                                                                                                                                                                                        | R: 5'-CATAAGAGTTAATAGGGGCTAG-3'     |
| <i>N-cadherin</i>                                                                                                                                                                      | F: 5'-CAACTTGCCAGAAAACCTCCAGG-3'    |
|                                                                                                                                                                                        | R: 5'-ATGAAACCGGGCTATCTGCTC-3'      |
| <i>Twist</i>                                                                                                                                                                           | F: 5'-ACCATCCTCACACCTCTG-3'         |
|                                                                                                                                                                                        | R: 5'-GATTGGCACGACCTCTTG-3'         |
| <i>Snail</i>                                                                                                                                                                           | F: 5'-ACGAGGTGTGACTAACTAT-3'        |
|                                                                                                                                                                                        | R: 5'-CGACAAGTGACAGCCATT-3'         |
| <i>Zeb1</i>                                                                                                                                                                            | F: 5'-TCATCGCTACTCCTACTGT-3'        |
|                                                                                                                                                                                        | R: 5'-TCACTGTCTTCATCCTCTTC-3'       |
| <i>Vimentin</i>                                                                                                                                                                        | F: 5'-CGCCTGCAGGATGAGATTCAG-3'      |
|                                                                                                                                                                                        | R: 5'-TCAGGGAGGAAAAGTTTGGAAGA-3'    |
| <i>E-cadherin</i>                                                                                                                                                                      | F: 5'-CGAGAGCTACACGTTACGG-3'        |
|                                                                                                                                                                                        | R: 5'-GGCCTTTTGACTGTAATCACACC-3'    |
| <p><i>MIR155HG</i>, <i>MIR155</i> host gene; miR, microRNA; NC, negative control; shRNA, short hairpin RNA; <i>SOX10</i>, SRY related-HMG-box 10; WT, wild-type; Mut, mutant type.</p> |                                     |
